# Supplementary material for: Constitutive and Inducible Resistance to Thrips Do Not Correlate With Differences in Trichome Density or Enzymatic-Related Defenses in Chrysanthemum
Source: PubMed Central journal article supplement (PMC7677159; doi:10.1007/s10886-020-01222-1), 2020-10-22
Supplement: 10886_2020_1222_MOESM1_ESM.pdf [file 10886_2020_1222_MOESM1_ESM.pdf]

**CONSTITUTIVE AND INDUCIBLE RESISTANCE TO THRIPS DO NOT CORRELATE WITH  
DIFFERENCES IN TRICHOME DENSITY OR ENZYMATIC-RELATED DEFENSES IN  
CHRYSANTHEMUM**

GANG CHEN \*

*Research group Plant Ecology and Phytochemistry, Cluster Plant Sciences and Natural Products, Institute of  
Biology, Leiden University, The Netherlands*

*College of Forestry, Sichuan Agricultural University, Chengdu, China*

PETER G.L. KLINKHAMER ‡

*Research group Plant Ecology and Phytochemistry, Cluster Plant Sciences and Natural Products, Institute of  
Biology, Leiden University, The Netherlands*

ROCÍO ESCOBAR-BRAVO ‡\*\*

*Research group Plant Ecology and Phytochemistry, Cluster Plant Sciences and Natural Products, Institute of  
Biology, Leiden University, The Netherlands*

\* Corresponding author

‡ Shared last co-authorship

\*\*Current address: Institute of Plant Sciences, University of Bern, Altenbergrain 21, 3013 Bern, Switzerland

Gang Chen, email: g.chen@sicau.edu.cn

## Supplementary materials

**Table S1** Breeding IDs of the 95 chrysanthemum cultivars used in this study

| <b>Cultivar</b> | <b>Breeding ID</b> | <b>Cultivar</b> | <b>Breeding ID</b> | <b>Cultivar</b> | <b>Breeding ID</b> | <b>Cultivar</b> | <b>Breeding ID</b> |
|-----------------|--------------------|-----------------|--------------------|-----------------|--------------------|-----------------|--------------------|
| 1               | DC-1               | 25              | DC-25              | 49              | 48837              | 73              | 56072              |
| 2               | DC-2               | 26              | DC-26              | 50              | 48639              | 74              | 56168              |
| 3               | DC-3               | 27              | DC-27              | 51              | 9403               | 75              | 56701              |
| 4               | DC-4               | 28              | DC-28              | 52              | 41475              | 76              | 56703              |
| 5               | DC-5               | 29              | 26741              | 53              | 45644              | 77              | 56713              |
| 6               | DC-6               | 30              | 31563              | 54              | 45785              | 78              | 56817              |
| 7               | DC-7               | 31              | 8713               | 55              | 48286              | 79              | 57352              |
| 8               | DC-8               | 32              | 7688               | 56              | 40931              | 80              | 57709              |
| 9               | DC-9               | 33              | 30600              | 57              | 43339              | 81              | 57773              |
| 10              | DC-10              | 34              | 21697              | 58              | 90753              | 82              | 57993              |
| 11              | DC-11              | 35              | 13185              | 59              | 36318              | 83              | 58498              |
| 12              | DC-12              | 36              | 8578               | 60              | 43110              | 84              | 59209              |
| 13              | DC-13              | 37              | 8393               | 61              | 44339              | 85              | 64952              |
| 14              | DC-14              | 38              | 4875               | 62              | 48942              | 86              | 65001              |
| 15              | DC-15              | 39              | 48864              | 63              | 9361               | 87              | 37511              |
| 16              | DC-16              | 40              | 47287              | 64              | 42215              | 88              | 37577              |
| 17              | DC-17              | 41              | 57067              | 65              | 42377              | 89              | 37630              |
| 18              | DC-18              | 42              | 55229              | 66              | 42629              | 90              | 42415              |
| 19              | DC-19              | 43              | 55238              | 67              | 42909              | 91              | 25533              |
| 20              | DC-20              | 44              | 46885              | 68              | 50223              | 92              | 22898              |
| 21              | DC-21              | 45              | 55223              | 69              | 50858              | 93              | 48015              |
| 22              | DC-22              | 46              | 55115              | 70              | 51643              | 94              | 20880              |
| 23              | DC-23              | 47              | 45728              | 71              | 56068              | 95              | 49230              |
| 24              | DC-24              | 48              | 90633              | 72              | 56069              |                 |                    |

**Table S2** Detailed statistical analysis performed for data displayed in each figure

| Figure  | Panel | Statistical test     | Factor and statistic value          | Degree of freedom     | Significance |
|---------|-------|----------------------|-------------------------------------|-----------------------|--------------|
| Fig. 2  | a     | ANOVA                | Genotype; $F = 6.59$                | $df1 = 94, df2 = 190$ | $P < 0.001$  |
|         | b     | Kruskal-Wallis       | Genotype; $\chi^2 = 250.1$          | $df = 94$             | $P < 0.001$  |
|         | c     | Spearman correlation | $r = 0.269; N = 95$                 | -                     | $P = 0.008$  |
| Fig. 3  | a     | Pearson correlation  | $r = 0.186, N = 12$                 | -                     | $P = 0.564$  |
|         | b     | Pearson correlation  | $r = 0.118; N = 12$                 | -                     | $P = 0.715$  |
|         | c     | Pearson correlation  | $r = 0.293; N = 12$                 | -                     | $P = 0.355$  |
| Fig. 4  | a     | GLM                  | Genotype; $Wald \chi^2 = 70.979$    | $df = 5$              | $P < 0.001$  |
|         |       |                      | JA or Mock; $Wald \chi^2 = 111.912$ | $df = 1$              | $P < 0.001$  |
|         |       |                      | Interaction; $Wald \chi^2 = 33.160$ | $df = 5$              | $P < 0.001$  |
|         | b     | GLM                  | Genotype; $Wald \chi^2 = 58.106$    | $df = 5$              | $P < 0.001$  |
|         |       |                      | JA or Mock; $Wald \chi^2 = 195.343$ | $df = 1$              | $P < 0.001$  |
|         |       |                      | Interaction; $Wald \chi^2 = 25.740$ | $df = 5$              | $P < 0.001$  |
|         | c     | GLM                  | Genotype; $Wald \chi^2 = 261.895$   | $df = 5$              | $P < 0.001$  |
|         |       |                      | JA or Mock; $Wald \chi^2 = 5.034$   | $df = 1$              | $P = 0.025$  |
|         |       |                      | Interaction; $Wald \chi^2 = 12.661$ | $df = 5$              | $P = 0.027$  |
|         | d     | GLM                  | Genotype; $Wald \chi^2 = 1036.121$  | $df = 5$              | $P < 0.001$  |
|         |       |                      | JA or Mock; $Wald \chi^2 = 0.010$   | $df = 1$              | $P = 0.922$  |
|         |       |                      | Interaction; $Wald \chi^2 = 4.057$  | $df = 5$              | $P = 541$    |
| Fig. 5  | a     | Pearson correlation  | $r = -0.619; N = 6$                 | -                     | $P = 0.190$  |
|         | b     | Pearson correlation  | $r = -0.118; N = 6$                 | -                     | $P = 0.824$  |
|         | c     | Pearson correlation  | $r = -0.037; N = 6$                 | -                     | $P = 0.944$  |
| Fig. S1 | a     | Kruskal-Wallis       | Genotype; $\chi^2 = 48.8$           | $df = 11$             | $P < 0.001$  |
|         | b     | ANOVA                | Genotype; $F = 3.32$                | $df1 = 11, df2 = 48$  | $P = 0.002$  |
| Fig. S2 | a     | Pearson correlation  | $r = -0.376; N = 12$                | -                     | $P = 0.228$  |
|         | b     | Pearson correlation  | $r = -0.567; N = 12$                | -                     | $P = 0.055$  |

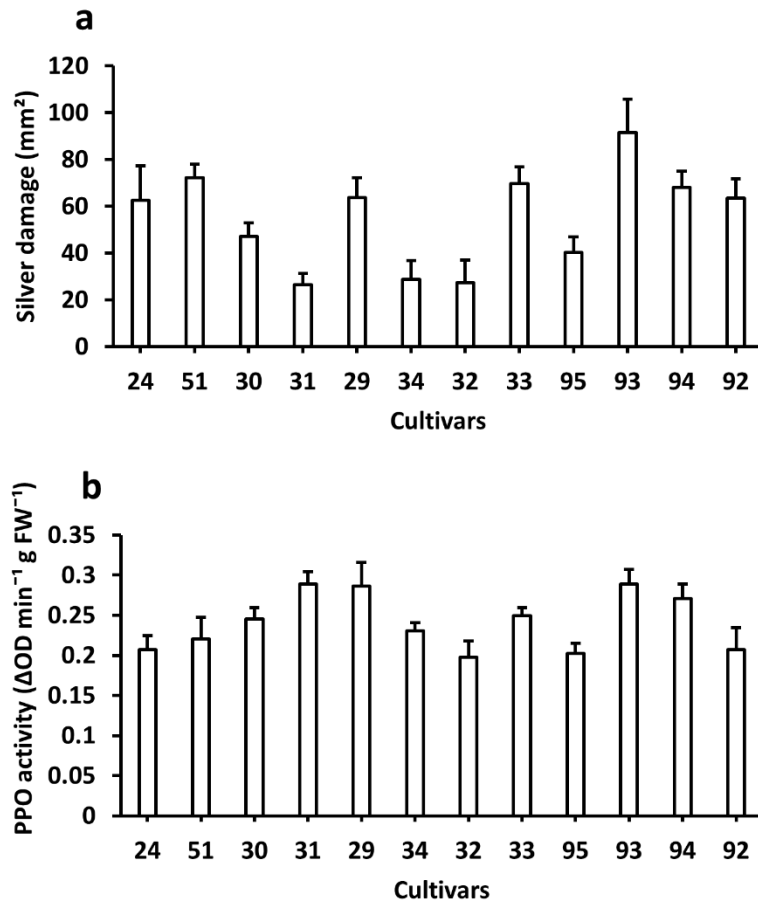

**Fig. S1** Phenotypic variation in Western flower thrips resistance and polyphenol oxidase activity among chrysanthemum cultivars. (a) Silver damage symptoms (mean  $\pm$  SEM,  $n = 10$ ) and (b) polyphenol oxidase (PPO) activity (mean  $\pm$  SEM,  $n = 5$ ) were determined in 12 different chrysanthemum cultivars. Plants were sampled for PPO activity measurement or used for non-choice whole plant bioassays at 35 days after planting. Western flower thrips (WFT) leaf damage ('silver damage') was determined at 7 days after WFT infestation

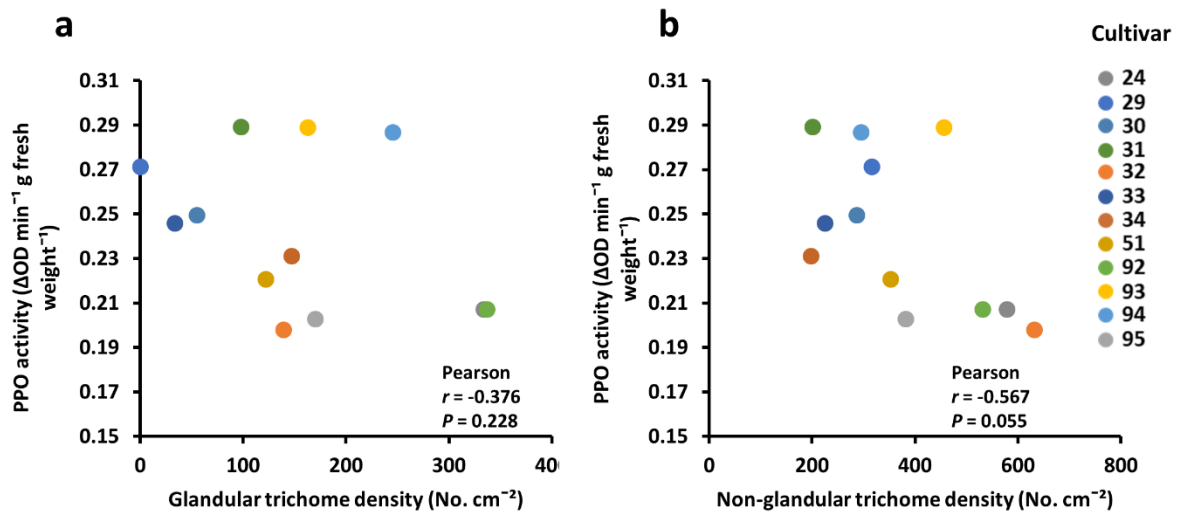

**Fig. S2** Relationship between polyphenol oxidase activity and glandular/non-glandular trichome density in chrysanthemum. Scatter plots depicting the relationship between (a) polyphenol oxidase (PPO) activity and glandular trichome density, and (b) PPO activity and non-glandular trichome density. Plants were sampled for PPO activity and trichome density at 35 days after planting. The plots display data obtained from 12 chrysanthemum cultivars. Each dot corresponds to the mean of five plant replicates per cultivar for PPO and trichome density, and of ten plant replicates per cultivar for silver damage symptoms
